# Supplementary material for: Difference Between Users and Nonusers of a Patient Portal in Health Behaviors and Outcomes: Retrospective Cohort Study
Source: PubMed Central journal article supplement (PMC6914108; doi:10.2196/13146), 2019-10-07

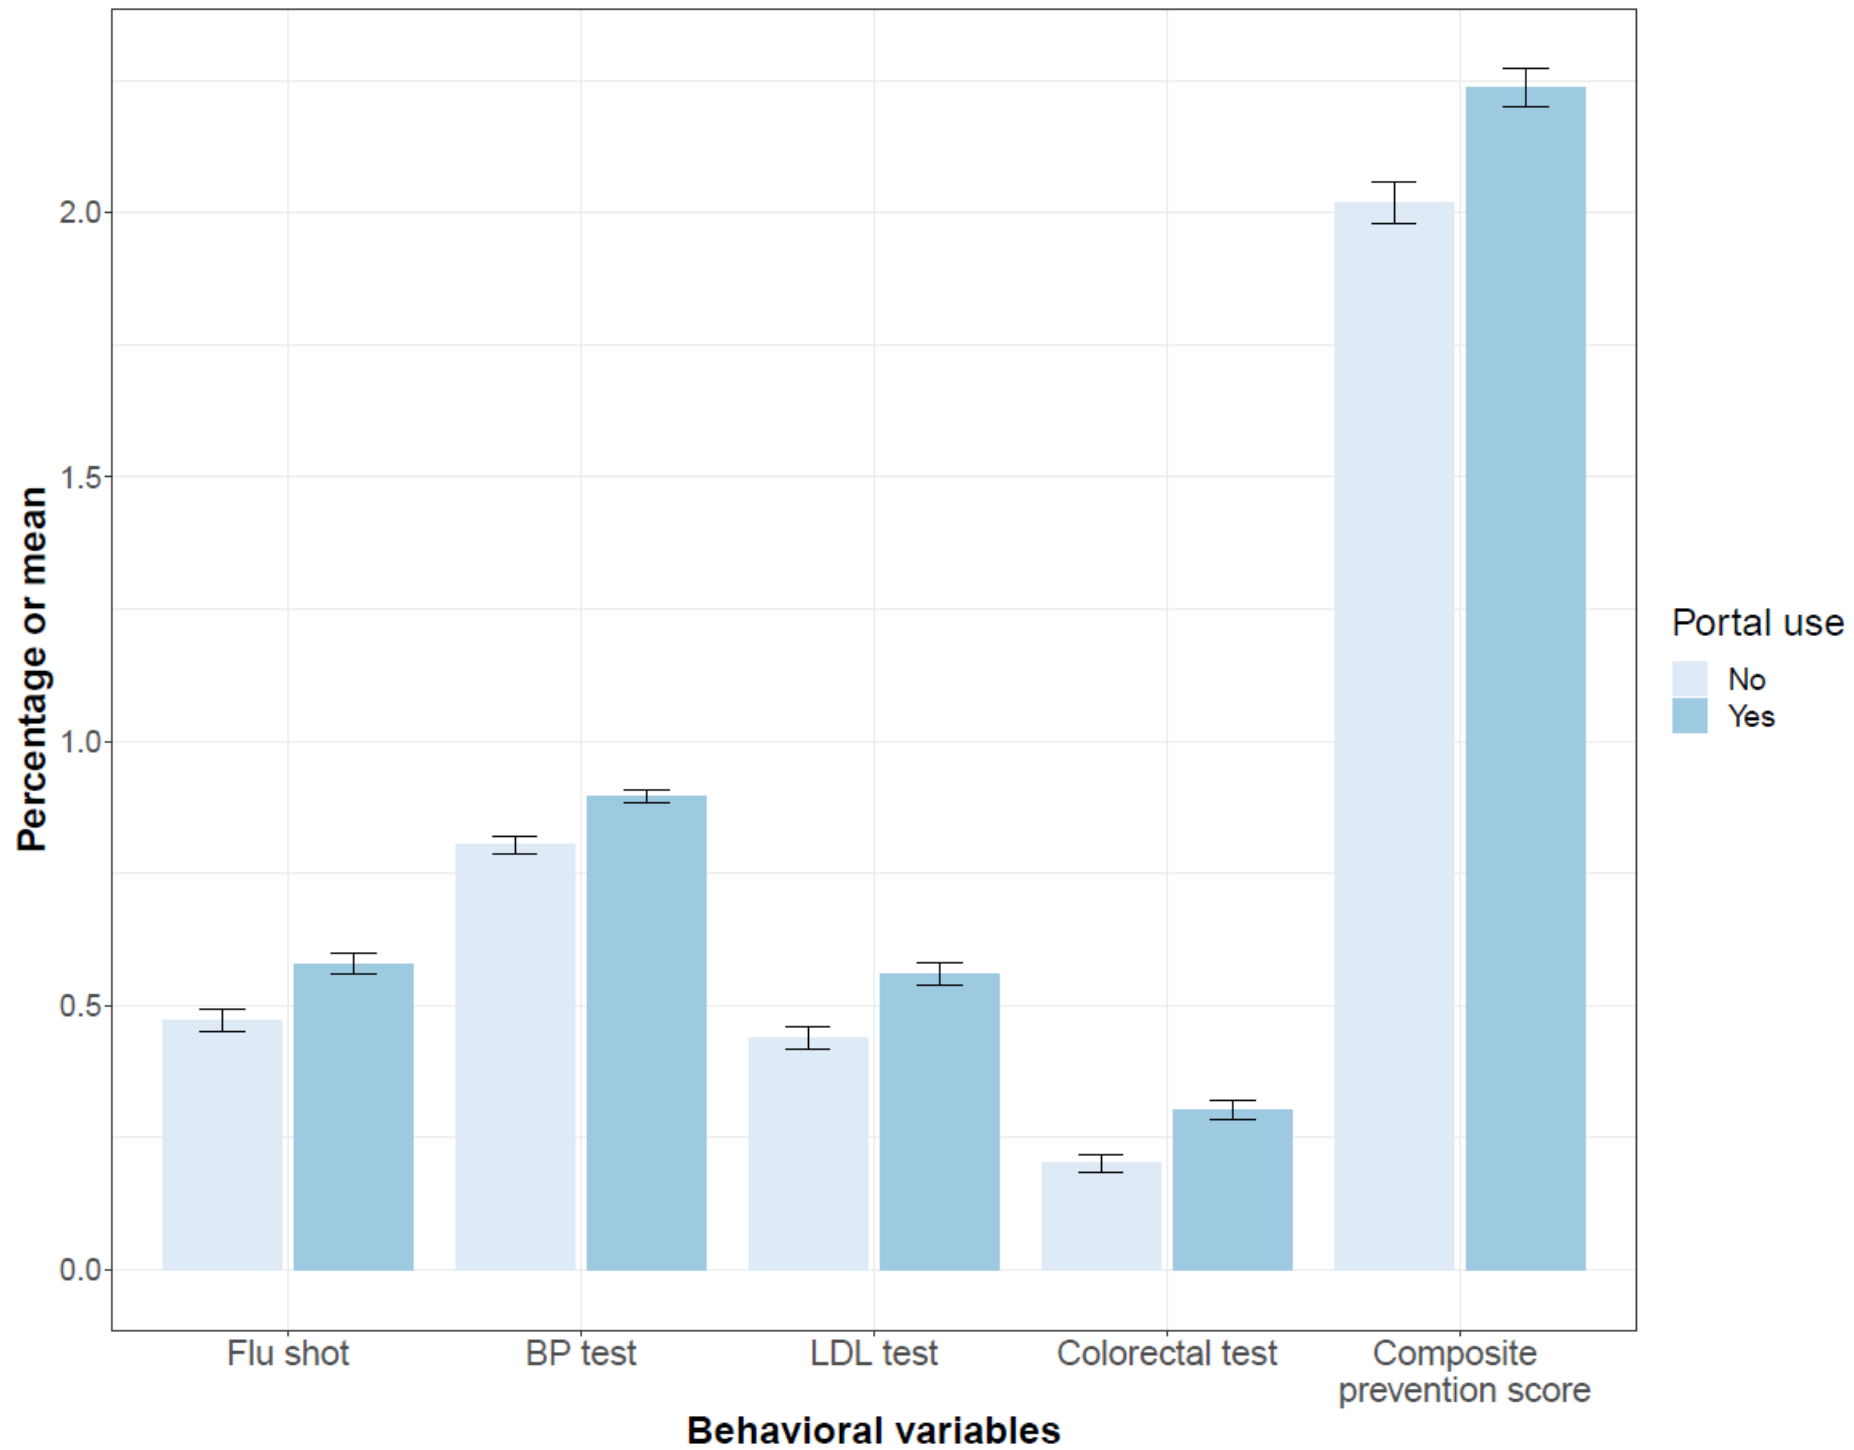

Supplement: jmir_v21i10e13146_app1.pdf [file jmir_v21i10e13146_app1.pdf]
